# Supplementary material for: Blue food demand across geographic and temporal scales
Source: PubMed Central journal article supplement (PMC8443621; doi:10.1038/s41467-021-25516-4), 2021-09-15
Supplement: 41467_2021_25516_MOESM2_ESM.pdf [file 41467_2021_25516_MOESM2_ESM.pdf]

## **Description of Additional Supplementary Files**

File Name: Supplementary Data 1

Description: Data associated with the creation of the figures in the article, including data output from modeling pipelines

File Name: Supplementary Data 2

Description: Data related to any modeling pipelines, including projected blue food demand to 2050.
